# Supplementary material for: The role of the stratospheric state in upward wave flux prior to Sudden Stratospheric Warmings: a SNAPSI analysis
Source: Copernicus journal article supplement (doi:10.5194/egusphere-2025-3611), 2025-08-15
Supplement: Supplementary file 1 [file egusphere-2025-3611-supplement.pdf]

# Supporting information for “The role of the stratospheric state in upward wave flux prior to Sudden Stratospheric Warmings: a SNAPSI analysis”

5 Blanca Ayarzagüena<sup>1</sup>, Amy H. Butler<sup>2</sup>, Peter Hitchcock<sup>3</sup>, Chaim I. Garfinkel<sup>4</sup>, Zac D. Lawrence<sup>5,6</sup>,  
Wuhan Ning<sup>4</sup>, Philip Rupp<sup>7</sup>, Zheng Wu<sup>8</sup>, Hilla Afargan-Gerstman<sup>9</sup>, Natalia Calvo<sup>1</sup>, Alvaro de la Cámara<sup>1</sup>,  
Martin Jucker<sup>10</sup>, Gerbrand Koren<sup>11</sup>, Daniel De Maeseneire<sup>1</sup>, Gloria L. Manney<sup>12,13</sup>, Marisol Osman<sup>14,15,16</sup>,  
Masakazu Taguchi<sup>17</sup>, Cory Barton<sup>18</sup>, Dong-Chang Hong<sup>19</sup>, Yu-Kyung Hyun<sup>20</sup>, Hera Kim<sup>21</sup>, Jeff Knight<sup>22</sup>,  
Piero Malguzzi<sup>23</sup>, Daniele Mastrangelo<sup>23</sup>, Jiyoun Oh<sup>20</sup>, Inna Polichtchouk<sup>24</sup>, Jadwiga H. Richter<sup>25</sup>, Isla  
R. Simpson<sup>25</sup>, Seok-Woo Son<sup>19,26</sup>, Damien Specq<sup>27</sup>, and Tim Stockdale<sup>24</sup>

10

<sup>1</sup> Department of Earth Physics and Astrophysics, Facultad de CC. Físicas, Universidad Complutense Madrid, Spain

<sup>2</sup> National Oceanic and Atmospheric Administration (NOAA) Chemical Sciences Laboratory, Boulder, CO, USA.

<sup>3</sup> Department of Earth and Atmospheric Sciences, Cornell University, USA.

<sup>4</sup> Fredy and Nadine Herrmann Institute of Earth Sciences, The Hebrew University of Jerusalem, Jerusalem, Israel.

15 <sup>5</sup> Cooperative Institute for Research in Environmental Sciences (CIRES), University of Colorado Boulder, Boulder, CO, USA

<sup>6</sup> National Oceanic and Atmospheric Administration (NOAA) Physical Sciences Laboratory, Boulder, CO, USA

<sup>7</sup> Faculty of Physics, Ludwig-Maximilians-University Munich, Germany

<sup>8</sup> Department of Atmospheric and Environmental Sciences, SUNY Albany, USA.

<sup>9</sup> Institute for Atmospheric and Climate Science, ETH Zürich, Switzerland.

20 <sup>10</sup> Climate Change Research Centre, University of New South Wales, Sydney, Australia

<sup>11</sup> Copernicus Institute of Sustainable Development, Utrecht University, The Netherlands

<sup>12</sup> NorthWest Research Associates, USA.

<sup>13</sup> New Mexico Institute of Mining and Technology, USA

25 <sup>14</sup> Universidad de Buenos Aires, Facultad de Ciencias Exactas y Naturales, Departamento de Ciencias de la Atmósfera y los Océanos.

<sup>15</sup> CONICET – Universidad de Buenos Aires. Centro de Investigaciones del Mar y la Atmósfera (CIMA).

<sup>16</sup> CNRS – IRD – CONICET – UBA. Instituto Franco-Argentino para el Estudio del Clima y sus Impactos (IRL 3351 IFAECI). Buenos Aires, Argentina.

<sup>17</sup> Department of Earth Science, Aichi University of Education, Kariya, Japan.

30 <sup>18</sup> Space Science Division, US Naval Research Laboratory, Washington, DC, USA

<sup>19</sup> School of Earth and Environmental Sciences, Seoul National University, Republic of Korea

<sup>20</sup> National Institute of Meteorological Science, Korea Meteorological Administration, Jeju, South Korea.

<sup>21</sup> Department of Atmospheric Sciences, University of Washington, Seattle, WA, USA

- 35 <sup>22</sup> Met Office Hadley Centre, Exeter, UK.
- <sup>23</sup> CNR-ISAC, Bologna, Italy.
- <sup>24</sup> European Centre for Medium-range Weather Forecasts, Reading, UK.
- <sup>25</sup> Climate and Global Dynamics Laboratory, National Center for Atmospheric Research, Boulder, CO, USA.
- <sup>26</sup> Interdisciplinary Program of Artificial Intelligence, Seoul National University, Republic of Korea.
- 40 <sup>27</sup> Centre National de Recherches Météorologiques, Université de Toulouse, Météo-France, CNRS, Toulouse, France.

## **Contents of this file**

Figures S1 to S8

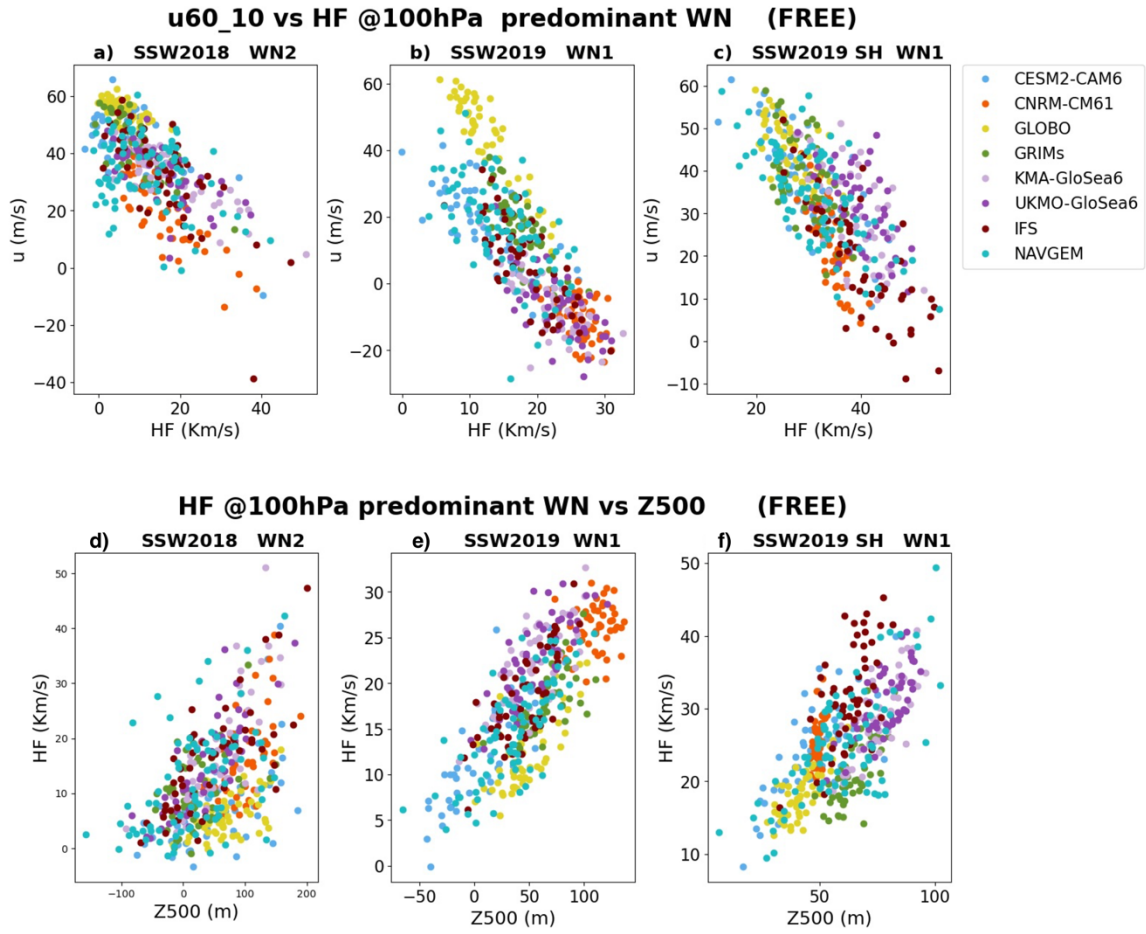

Figure S1. Scatter plots of (a)-(c)  $u_{60\_10}$  (m/s) averaged during the SSW onset date vs heat flux at 100hPa (K m/s) for the predominant wavenumber and averaged during the burst of tropospheric wave activity associated with each SSW. (d) – (f) Same as (a)-(c) but for the heat flux at 100hPa (K m/s) vs the combined Z500 anomalies (m) of the corresponding tropospheric precursors. In all plots each dot represents a single ensemble member. The variables represented in both plots follow a linear relationship.

## SSW2018

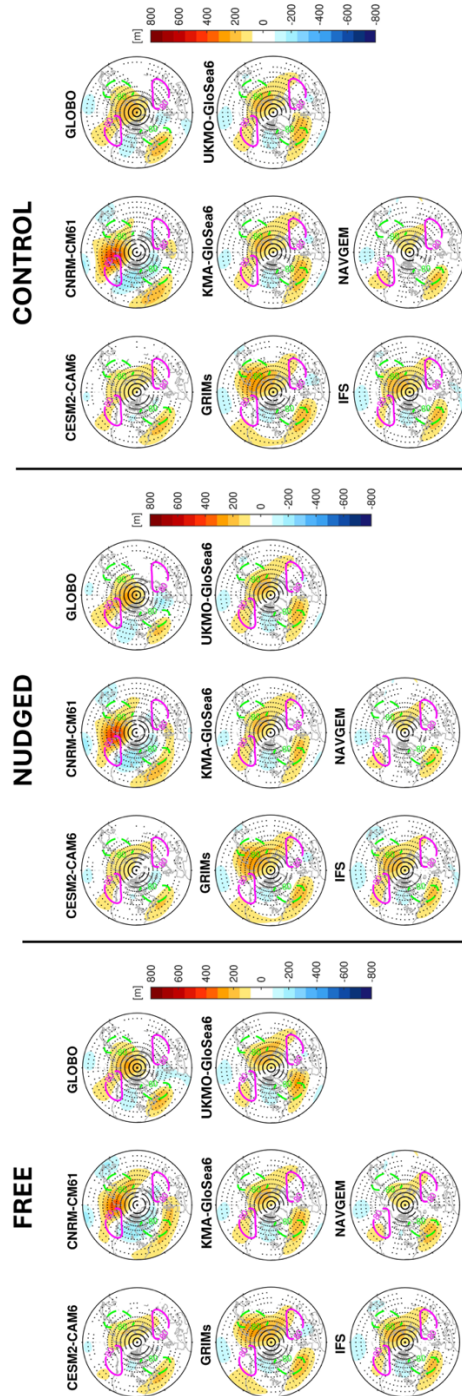

Figure S2. Composite maps of Z500 anomalies (m) for the period 3rd-13th February 2018 for the (a) FREE, (b) NUDGED and (c) CONTROL experiments. The magenta solid (green dashed) contours show the ERA5 climatological WN2 component of Z500 at  $\pm 80$  m. The WN2 spatial pattern in all experiments appears rotated relative to the climatological WN2 wave patterns. The stratospheric state does not seem to highly influence the tropospheric circulation prior to the SSW2018.

# SSW2019

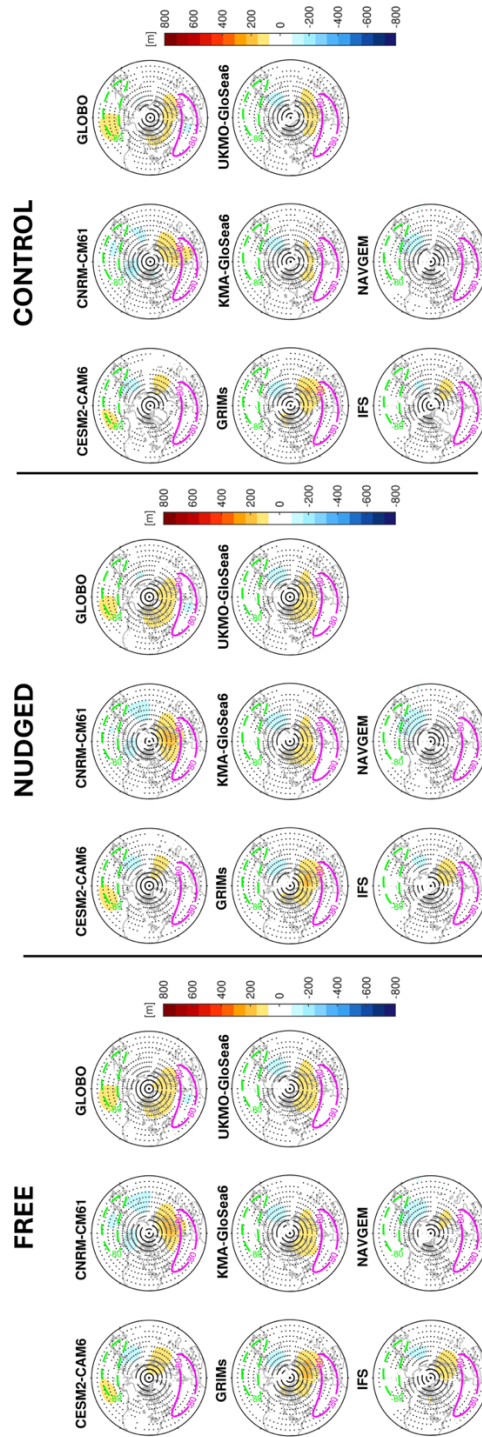

Figure S3. Same as Figure S2 but for the period 18th-30th December 2018. The red solid (green dashed) contours show the ERA5 climatological WN1 component of Z500 at  $\pm 80$  m. The patterns are very similar to those shown in Fig.6 associated with a vortex deceleration.

# SSW2019 SH

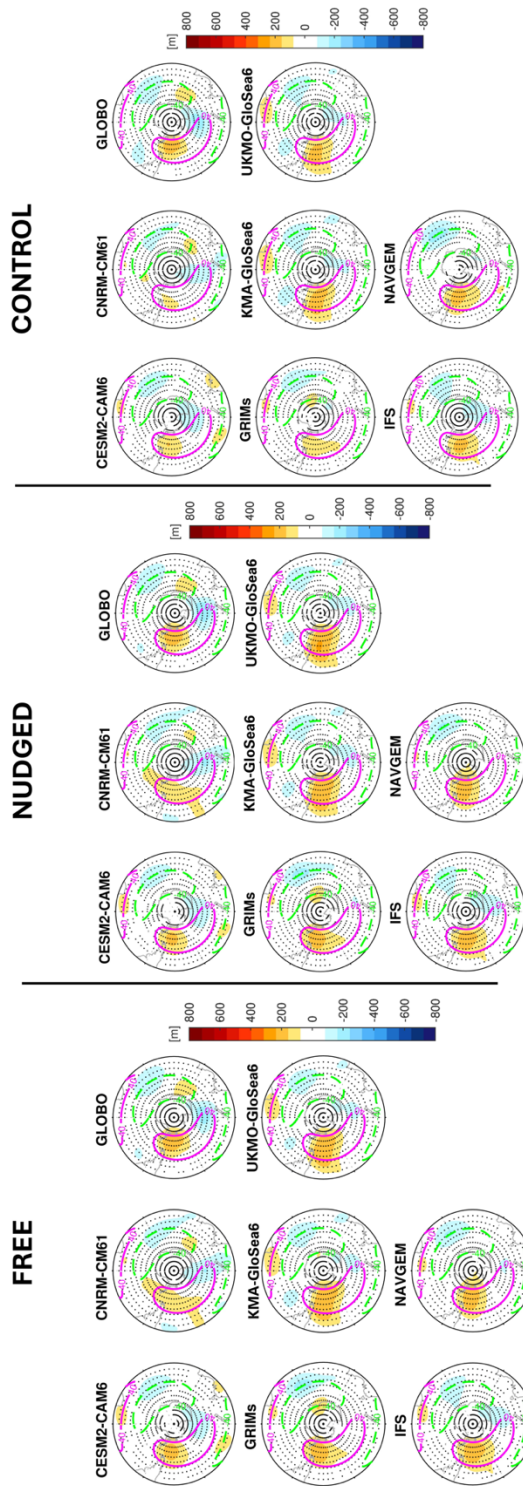

Figure S4. Same as Figure S3 but for 1st - 10th September 2019. Similar conclusions are derived to those of SSW2019 (Figure S3).

Wave 2 propagation in 'nudged' runs  
averaged between Feb 03 and Feb 05

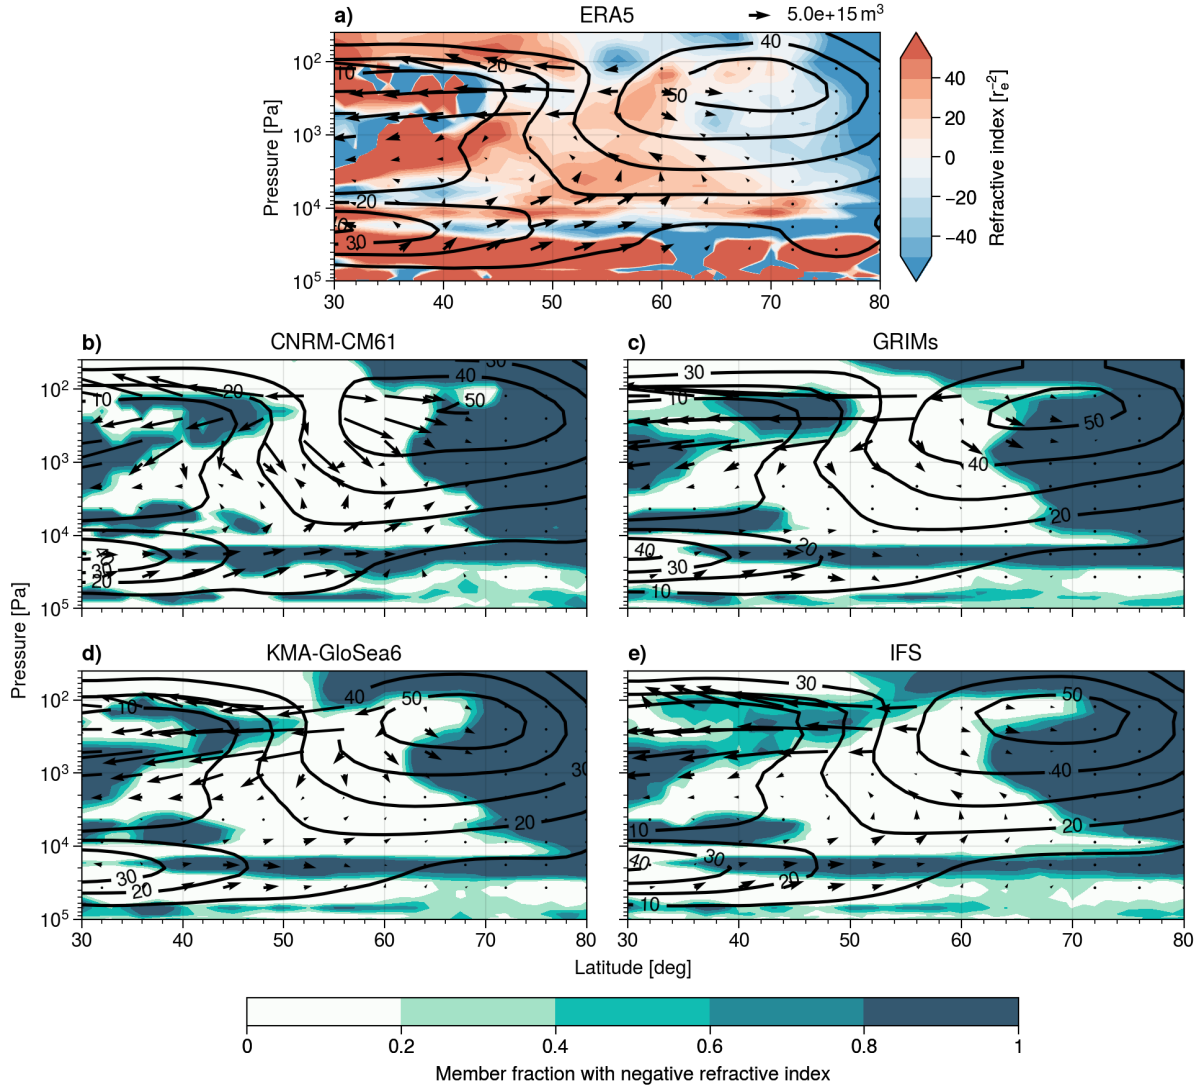

Figure S5. (a) Eliassen-Palm flux (arrows,  $\text{m}^3$ ) and  $n^2$  (shading,  $\text{a}^{-2}$ ) for the WN2 wave component and zonal mean zonal wind (black contours) for 3rd-5th February 2018 in ERA5. (b)-(e) Same as (a) but for the NUDGED experiment of CNRM-CM6-1, GRIMs, KMA-GloSea6, and IFS. In (b)-(e) shading indicates the member fraction of negative  $n^2$  instead of  $n^2$ . Unlike FREE experiments (Fig. 12), all systems show a region of low probability of negative  $n^2$  between  $55^\circ$ - $70^\circ\text{N}$ , which favors the poleward wave propagation in the upper stratosphere.



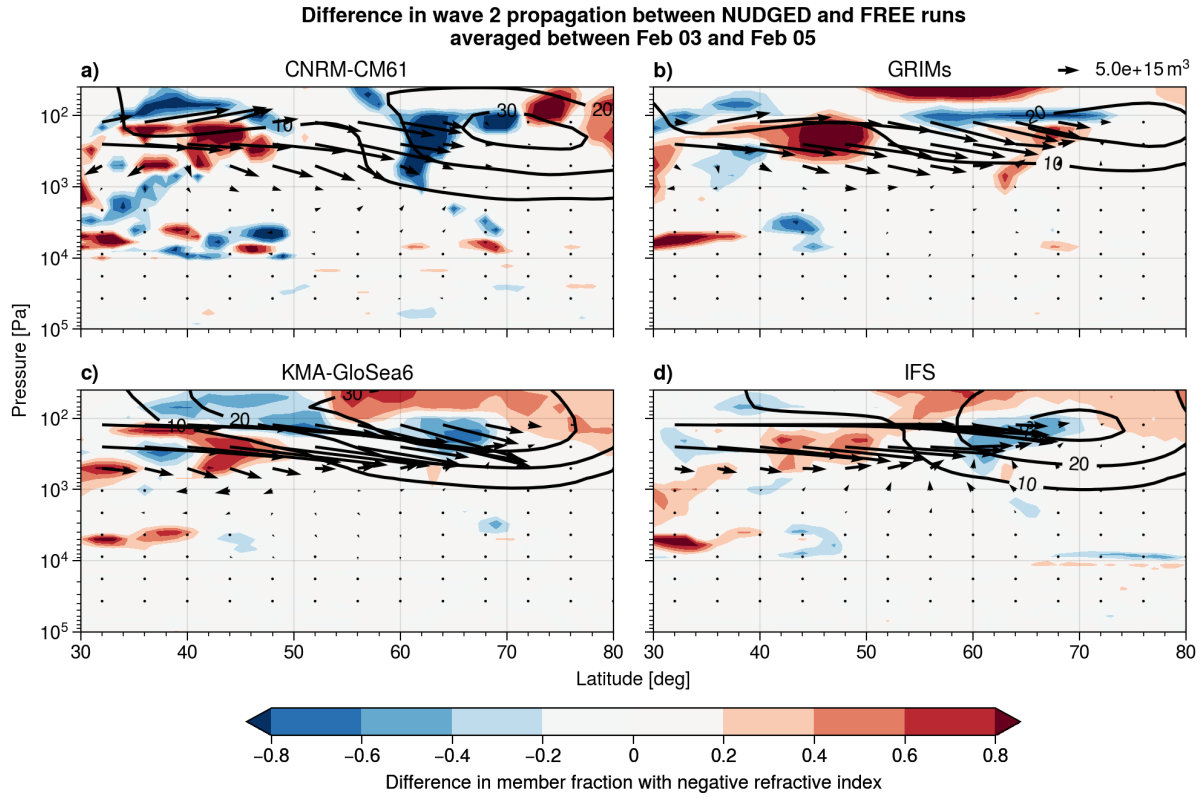

70 **Figure S6. NUDGED-minus-FREE difference of Eliassen-Palm flux (arrows,  $m^3$ ) and member fraction of negative  $n^2$  (shading) and zonal mean zonal wind (black contours) for 3rd-5th February 2018 in (a) CNRM-CM6-1, (b) GRIMs, (c) KMA-GloSea6 and (d) IFS. The difference plots highlight the enhanced poleward wave propagation in NUDGED with respect to FREE.**



Wave 2 propagation in 'nudged' runs  
averaged between Feb 06 and Feb 08

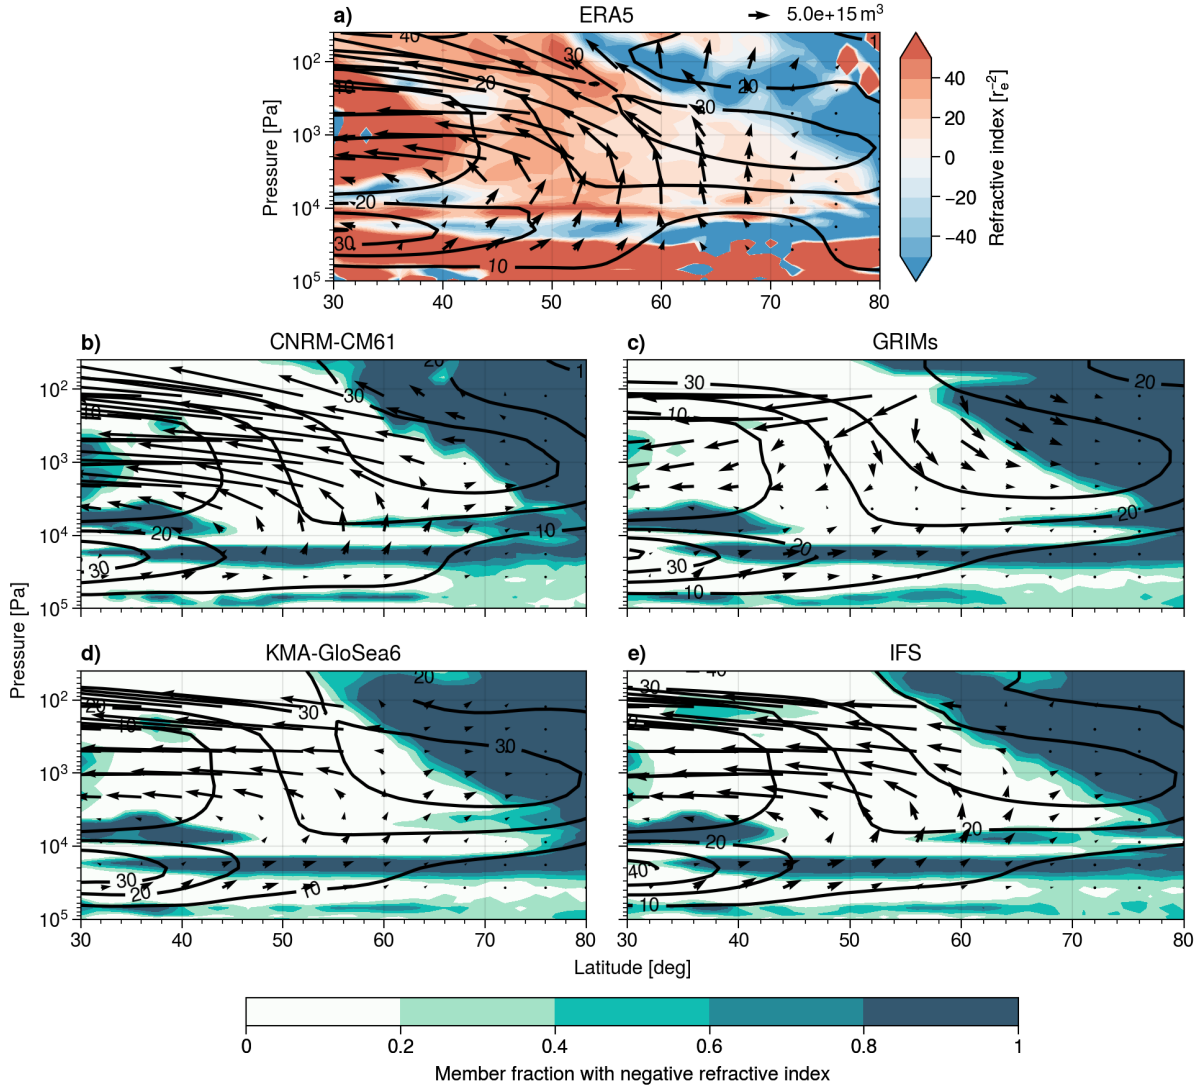

Figure S7. Same as Figure S5 but for 6th-8th February 2018.

Difference in wave 2 propagation between NUDGED and FREE runs  
averaged between Feb 06 and Feb 08

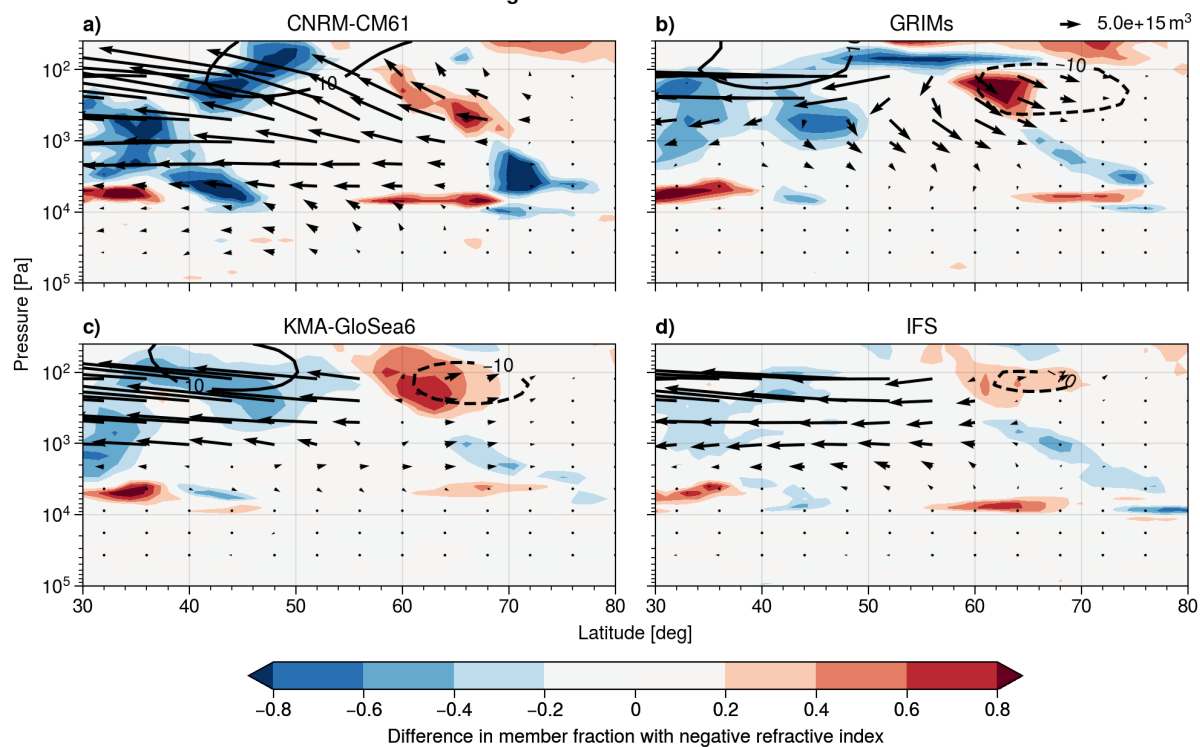

75

Figure S8. Same as Figure S6 but for 6th-8th February 2018.
